14 **Running Title:** High HDR efficiencies using melted dsDNA donors.

15 **Key Words:** CRISPR, HDR, Genome Editing, Donor DNA

16 **Corresponding Author:** Craig C. Mello

17 **Mailing Address:**

18 RNA Therapeutics Institute,

19 University of Massachusetts Medical School,

20 368 Plantation Street, AS5-2049,

21 Worcester, MA 01605, USA.

22 Phone: 508-845-1602

23 email: [Craig.Mello@umassmed.edu](mailto:Craig.Mello@umassmed.edu)

24 **ABSTRACT**

25 **CRISPR genome editing has revolutionized genetics in many organisms. In the nematode**  
26 ***Caenorhabditis elegans* one injection into each of the two gonad arms of an adult**  
27 **hermaphrodite exposes hundreds of meiotic germ cells to editing mixtures, permitting the**  
28 **recovery of multiple indels or small precision edits from each successfully injected animal.**  
29 **Unfortunately, particularly for long insertions, editing efficiencies can vary widely,**  
30 **necessitating multiple injections, and often requiring co-selection strategies. Here we show**  
31 **that melting double stranded DNA (dsDNA) donor molecules prior to injection increases the**  
32 **frequency of precise homology-directed repair (HDR) by several fold for longer edits. We**  
33 **describe troubleshooting strategies that enable consistently high editing efficiencies**  
34 **resulting, for example, in up to 100 independent GFP knock-ins from a single injected**  
35 **animal. These efficiencies make *C. elegans* by far the easiest metazoan to genome edit,**  
36 **removing barriers to the use and adoption of this facile system as a model for understanding**  
37 **animal biology.**

38

39 In the nematode worm *C. elegans*, genome editing can be achieved by direct injection of  
40 Cas9 guide-RNA ribonucleoprotein (RNP) complexes into the syncytial ovary (CHO *et al.* 2013;  
41 PAIX *et al.* 2015; DOKSHIN *et al.* 2018). In the worm germline, such injections afford the editing  
42 machinery simultaneous access to hundreds of meiotic germ nuclei that share a common  
43 cytoplasm. Under optimal conditions the frequency of F1 progeny with indels caused by non-  
44 homologous end joining (NHEJ) can be greater than 90% of those progeny expressing a co-  
45 injection plasmid marker gene (DOKSHIN *et al.* 2018). Leveraging these high cutting efficiencies,  
46 precise genome editing is readily achieved using short (under ~200 nucleotide [nt]), single-

47 stranded oligodeoxynucleotide (ssODN) donors, permitting insertions of up to ~150 nt in length  
48 (ARRIBERE *et al.* 2014; ZHAO *et al.* 2014; PAIX *et al.* 2015; PRIOR *et al.* 2017; DOKSHIN *et al.*  
49 2018). However, with longer dsDNA donors (~1kb), HDR events are recovered at lower  
50 frequencies, require more complex protocols, high concentrations of the donor DNA, and typically  
51 require screening the broods of multiple injected animals (TZUR *et al.* 2013; ARIBERE *et al.* 2014;  
52 KIM *et al.* 2014; WARD 2015; PAIX *et al.* 2016; SCHWARTZ AND JORGENSEN 2016; PAIX *et al.* 2017;  
53 DOKSHIN *et al.* 2018; FARBOUD *et al.* 2019; SILVA-GARCIA *et al.* 2019; VICENCIO *et al.* 2019).

54         There are multiple reasons why longer repair templates may be less efficient as donors for  
55 HDR compared to ssODNs. First, empirical studies suggest that long dsDNA is more toxic than  
56 short single-stranded DNA (MELLO *et al.* 1991), limiting safe donor concentrations to less than  
57 200 ng/ $\mu$ l for ~1kb donors. Second, upon injection into germline cytoplasm, dsDNA molecules  
58 quickly form large extra-chromosomal arrays via both end-joining and homologous recombination  
59 pathways, and appear to do so while sequestered away from genomic DNA (STINCHCOMB *et al.*  
60 1985; MELLO *et al.* 1991). Concatenation of donor molecules into large arrays would have the  
61 effect of lowering the number of individual molecules available to access and to template repair at  
62 the target site double strand break (DSB). Moreover, if injected DNA assembles concatenates  
63 while sequestered from the nuclear DNA—perhaps within de novo nucleus-like organelles  
64 (FORBES *et al.* 1983)—this process could preclude templated repair of a genomic target site until  
65 after the sequestered concatenates gain nuclear access after nuclear envelope breakdown occurs  
66 post-fertilization.

67         In a recent study, we showed that CRISPR-mediated HDR could be increased ~4-fold by  
68 mixing, melting, and re-annealing overlapping donor molecules to create donor templates with  
69 single-stranded overhangs (DOKSHIN *et al.* 2018). In those previous studies, we limited our

70 analysis to a cohort of F1 ‘Roller’ progeny that express the co-injection marker gene *rol-6*  
71 (*su1006*). Here, to explore editing efficiency outside the Roller cohort, we scored the entire brood  
72 of each injected animal for precisely edited progeny that incorporate and express fluorescent  
73 protein markers (GFP or mCherry). We show that the vast majority of insertions occurred later in  
74 the brood, after the cohort of progeny that express the Roller phenotype. Whereas overhangs  
75 improved the frequency of editing among the F1 Rollers (DOKSHIN *et al.* 2018), they had no benefit  
76 within this latter segment of the brood. Instead, melting the donor molecules, alone, sufficed to  
77 increase the HDR frequency to as high as 50% of the post-injection progeny. We provide a protocol  
78 and troubleshooting strategies that enable even a novice injector to achieve their editing goals and  
79 to optimize editing efficiencies.

80

81

82

83

84

85

86

87

88

## 89 MATERIALS AND METHODS

90 Detailed editing protocol is provided in Supplemental Material, **File S1**.

### 91 Strains and genetics

92 All the strains were generated in the Bristol N2 background unless specified otherwise and  
93 cultured on normal growth media (NGM) plates seeded with OP50 bacteria (BRENNER 1974).

94 Strains used in this study are listed in Supplemental Material, **Table S1**.

95 At CSR-1 locus, GFP was introduced between FLAG::linker(9bp) and TEV in  
96 FLAG::linker::TEV::CSR-1 strain.

### 97 Scoring methodology

98 Injected P0 animals were individually cultured on NGM plates at room temperature (22°C- 23°C)  
99 unless specified otherwise. P0 animals with more than 100 post-injection progeny and at least 20  
100 Rollers were selected— except at 100 ng/μl and 200 ng/μl of dsDNA donor where number of  
101 Rollers can be lower than 20 due to toxicity— and their F1 progeny were scored between 72 and  
102 90 hours post-injection. All the F1 progeny from each brood were mounted onto 2% agarose pads  
103 and screened under fluorescence microscope for GFP or mCherry expression. GraphPad Prism  
104 (Version 8.4) was used to perform statistical tests and calculate P-values.

### 105 Oligos and donors

106 End-modified donors were generated by PCR using oligos with 5' SP9 modifications (IDT). Oligos  
107 used for to generate *hrde-1* and *F53H1.1 gfp* donors also contain 15bp linkers on either end of *gfp*  
108 which also serve as PCR primers. Sequences of all the crRNAs and oligos are provided in  
109 Supplemental Material, **Table S2** and **Table S3** respectively.

110  
111  
112  
113

114 Data availability

115

116 The authors state that all data necessary for confirming the conclusions presented in the manuscript

117 are represented fully within the manuscript. All the reagents are available upon request.

118

## 119 RESULTS

### 120 Melting the donor dramatically stimulates HDR for longer edits

121 We recently showed that melting and reannealing donor molecules to create asymmetric donors  
122 with single-stranded homology arms can improve the frequency of CRISPR-mediated homology-  
123 directed insertions among transformants that were positive for a transformation marker (DOKSHIN  
124 *et al.* 2018). Because transformation markers can cause confounding effects or toxicity, we decided  
125 to conduct an initial study in which markers were omitted altogether. For this purpose, we chose  
126 to target the insertion of *gfp* into the easily scored *glh-1* locus, which encodes a VASA-related  
127 DEAD-box protein that localizes robustly to germline perinuclear foci known as P granules or  
128 nuage.

129 We prepared the *gfp* donor by PCR using primers tailed with 35 nt of homology to the *glh-*  
130 *1* locus (**Figure 1A**). In order to separately analyze the consequences of melting and of generating  
131 single-stranded overhangs we prepared three types of donor, (i) PCR products that were never  
132 melted, “unmelted donors,” (ii) “melted donors” that were heated and allowed to reanneal, and  
133 (iii) “asymmetric melted donors” that were prepared by heating a mixture of two overlapping *gfp*  
134 PCR products (one with 35-bp homology to *glh-1* at each terminus and one without (DOKSHIN *et*  
135 *al.* 2018). For simplicity, we refer to denaturing and quickly cooling the donor as “melting,” (see  
136 Methods). We injected each type of donor along with Cas9-guide-RNPs targeting *glh-1* into the  
137 core cytoplasm of the pachytene syncytium just distal to the gonad turn. Ideal injections result  
138 when the flow of the injection solution extends bilaterally from the injection site into the queue of  
139 oocytes at the proximal end and into mitotic region at the distal end (MELLO *et al.* 1991). Only  
140 animals with two such injections—one per arm—were analyzed.



141 As previously shown (DOKSHIN *et al.* 2018) the asymmetric melted donor outperformed  
142 the unmelted donor. The asymmetric *gfp::glh-1* donor yielded 381 GFP-positive transformants  
143 among 900 F1 progeny, or 42% of total post injection progeny. The unmelted symmetric donor  
144 in contrast yielded half as many edits, 161 GFP-positive transformants among 740 post-injection  
145 progeny, (22%). Surprisingly, the symmetric melted donor was just as effective as the asymmetric  
146 melted donor, yielding 331 GFP positives among 906 F1 progeny, (37%). Thus, when the entire  
147 brood is scored a melted symmetric donor was as effective as its asymmetric counterpart. For  
148 melted donors, the number of GFP positive edits equaled approximately two-fifths of all post  
149 injection progeny exceeding the total number of Roller transgenics typically recovered per injected  
150 animal (**Figure S1 and see below**).

151

### 152 **Efficient HDR occurs over a broad range of donor concentrations**

153 To explore how the frequency of *gfp* edits varied over a range of donor concentration, we injected  
154 unmelted or melted *gfp::glh-1* donor at concentrations of 6.25 ng/μl, 12.5 ng/μl, 25 ng/μl, 50 ng/μl,  
155 100 ng/μl and 200 ng/μl (25 ng = 0.04 pmol). In order to control for injection quality, each injection  
156 mix included 40 ng/μl of the *rol-6(su1006)* co-transformation marker. For each donor mix, we  
157 injected 5 to 7 worms, singled those receiving optimal bilateral injections, and further analyzed  
158 two worms that made at least 100 post-injection progeny, including at least 20 Rollers. We then  
159 screened all the post-injection progeny—Roller and non-Roller—for germline GFP expression.  
160 We noted that the overall percentage of *gfp* insertions per injected animal (40%–50% for melted  
161 donors) (**Figure 1B**) was similar to levels achieved when the *rol-6* marker was omitted (**Figure**  
162 **S1**), suggesting that the *rol-6* marker does not interfere with the overall efficiency of editing.  
163 Surprisingly, the frequency of GFP-positive progeny per injected animal remained similar over a

164 32-fold range of donor concentrations. Melted donors consistently outperformed unmelted donors  
165 at every concentration (**Figure 1B**). These results suggest that, even at the donor concentration of  
166 6.25 ng/ $\mu$ l, the HDR efficiency may be near saturation. At donor concentrations above 25 ng/ $\mu$ l,  
167 the frequency of Rollers per injected animal declined, suggesting that these higher concentrations  
168 cause toxicity (**Figure S2**). Taken together, these findings suggest that melted donors provide high  
169 rates of HDR with low toxicity over donor concentrations in the range of 6.25 ng/ $\mu$ l (0.01 pmol/ $\mu$ l)  
170 to 25 ng/ $\mu$ l (0.04 pmol/ $\mu$ l). Based on these findings we chose to use 25 ng/ $\mu$ l of donor in further  
171 investigations.

172 We next wished to examine how editing efficiencies vary among the Roller and non-Roller  
173 cohorts of post-injection progeny. We found that melted donors out-performed unmelted donors  
174 in both Roller and non-Roller cohorts (**Figure 1, C-E**), yielding several dozen *gfp* edited progeny  
175 per injected animal (as shown in two representative broods, **Figure 1C**). Strikingly, the fraction of  
176 GFP expressing progeny was much higher among non-Rollers (49%) (**Figure 1E**) compared to  
177 Rollers (15%) (**Figure 1D**).

178 To confirm the generality of these findings, we targeted two additional germline-expressed  
179 genes, *csr-1* and *znfx-1* (**Figure 1, F-K**). In both cases, melted donors consistently outperformed  
180 unmelted donors for *gfp* and *mCherry* insertions respectively (**Figure 1, F and I**). When melted  
181 donors were used, the fraction of animals with precision insertions was approximately ~10-fold  
182 higher than levels obtained with unmelted donors. This enhancement was observed in both the  
183 Roller (**Figure 1, G and J**) and non-Roller cohorts (**Figure 1, H and K**). We also explored whether  
184 melted donors were beneficial for editing with Cas12a (CPF1) (EBBING *et al.* 2017) RNPs —  
185 which recognize an AT rich TTTV protospacer adjacent motif (PAM) sequence. Indeed, Cas12a

186 editing yielded high HDR efficiencies comparable to those achieved with Cas9 RNPs for *gfp*  
187 insertion at both the *glh-1* and *F53H1.1* loci (**Figure S3**) (See **File S1** for protocol).

188

### 189 **Editing efficiency peaks later in the brood after the Roller cohort of progeny are produced**

190 The finding that HDR events are more prevalent among non-Roller progeny might reflect different  
191 developmental competencies of germ nuclei to form these distinct types of transgenics. For  
192 example, distal pachytene germ nuclei may be more receptive to recombination between the target  
193 chromosomal locus and the *gfp* donor, whereas more proximal germ nuclei may be more receptive  
194 to forming extra-chromosomal transgenes driven by recombination between co-injected DNA  
195 molecules (see Discussion) (MELLO *et al.* 1991). To examine these possibilities, we followed the  
196 production of Roller and GFP-positive progeny over the entire post-injection brood. Worms  
197 receiving ‘ideal’ bilateral injections of an editing mix prepared with melted *gfp::glh-1* donor (25  
198 ng/μl) and *rol-6* co-injection marker (40 ng/μl) were cultured in two groups of 4 injected animals.  
199 Each group of animals was transferred every 4 hours to fresh plates to divide their broods into 12  
200 segments over the next two days. Animals were transferred one more time on the third day (64  
201 hours post-injection) thus dividing the progeny into 14 groups (**Figure 2A**). We then scored the  
202 frequency of Roller progeny and GFP-positive progeny in each segment.

203 Consistent with the idea that Roller extra-chromosomal transgenes assemble in more  
204 proximal germ cells, nearly 100% of the Roller progeny were produced within the first 28 hours  
205 post injection. The frequency of Rollers peaked between 8 and 12 hours post-injection where  
206 Rollers comprised 81% of the 47 progeny produced in the interval. The frequency of Roller  
207 progeny remained above 60% until 20 hours post injection, declining to ~30% then 13% over the  
208 next two 4-hour intervals. Rollers were virtually absent among progeny produced after 28 hours

209 (Figure 2B). In striking contrast, the frequency of precision editing events was low within the first  
210 24 hours and then appeared to plateau and remain high during the entire remainder of the brood  
211 (Figure 2B). For example, only 20% of the 306 progeny produced in the first 24 hours were GFP  
212 positive while an average of 54% were positive among the progeny produced thereafter (n=1327).  
213 Importantly, while GFP precision editing was less frequent within the first 24 hours (where Roller  
214 transgenics were found), precision editing was not under-represented within the Roller cohort. For  
215 example, we found that 24% of Rollers vs 20% of all animals produced in the first 24 hours were  
216 GFP positive (Figure 2B). Moreover, among GFP positive animals produced in this interval 60%  
217 were Rollers. Thus, the Roller marker positively correlates with *gfp* editing but does so within a  
218 cohort of progeny that precedes the optimal editing window for *gfp* insertion (See Discussion).

219

#### 220 Donor purity is crucial for best HDR efficiencies

221 Although *rol-6* transformation precedes the optimal window of *gfp* insertion (as shown above), we  
222 nevertheless found that the *rol-6* marker provides a valuable troubleshooting metric (Figure S2).  
223 For example, while attempting to knock-in *gfp* at two different loci (*hrde-1* and *F53H1.1*), *gfp*  
224 insertions were unexpectedly rare. These experiments were conducted using melted TEG-modified  
225 donors (GHANTA *et al.* 2018), which typically yield as many as 100 GFP+ progeny per injected  
226 worm. However, despite ideal injections that produced high numbers of Roller progeny, only 2  
227 (average) Rollers were GFP positive per brood (spin-column, Figure 3, A and D). Scoring entire  
228 broods for GFP, we only obtained a maximum of 18 (*hrde-1*) (Figure 3A, P0# 2) and 13 (*F53H1.1*)  
229 (Figure 3D, P0#s 1 and 2) GFP-positive progeny per injected worm. The fraction of Rollers (spin-  
230 column, Figure 3, B and E) or non-Rollers (spin-column, Figure 3, C and F) expressing GFP  
231 stayed below 8% at both the loci. Because the number of Rollers per injected animal was near the

232 optimal range, we reasoned that the injection quality was good, injected animals were healthy, and  
233 the injection mixture was non-toxic.

234 To understand why editing was so infrequent, we randomly sequenced the target site in 25  
235 F1 Rollers. In 21 of 24 Rollers, we identified non-wildtype sequences at the target site (**Figure**  
236 **3G**), indicating that double-strand breaks were not the limitation. Importantly, none of these 21  
237 Rollers contained *gfp* insertions (**Figure 3G**). Upon reading the sequencing trace, we found that  
238 13 F1 animals contained a 15-bp insertion precisely where GFP sequences should have inserted  
239 (**Figure 3G and 3H**). To our surprise, this short sequence perfectly matched a segment of the PCR  
240 oligo sequences (**Figure 3I**), and thus could be explained by insertion of a primer fragment or  
241 primer-dimer that was produced inadvertently during donor preparation. To test this possibility,  
242 we purified the *gfp* donors by size-exclusion using SPRI paramagnetic beads or by gel-extraction.  
243 Purifying the *hrde-1* donor with SPRI beads (optimized to exclude fragments smaller than 300 bp)  
244 modestly increased the percentage of GFP-positive progeny to 10% of F1 Rollers (n=212; **Figure**  
245 **3B**) and 32% of non-Roller progeny (n=625; **Figure 3C**). By contrast, gel-purified *hrde-1* donor  
246 dramatically increased the percentage of GFP-positive progeny to 29% of F1 Rollers (n=163;  
247 **Figure 3B**) and 49% of non-Rollers (n=538; **Figure 3C**), with as many as 95 GFP-positive  
248 progeny from one injected worm (**Figure 3A, P0#5**). Similar results were obtained after gel  
249 purification of the *F53H1.1* donor (**Figure 3, D-F**). These findings demonstrate the utility of the  
250 Roller marker as a metric for troubleshooting the editing protocol and reveal the importance of  
251 removing PCR-based contaminants from donor preparations to achieve best knock-in efficiencies.

252

253

## 254 DISCUSSION

255 We initiated these investigations to explore why long (~1-kb) DNA donors were less  
256 efficacious than short single-stranded oligonucleotide (ssODN) donors in *C. elegans*. We have  
257 shown that melting the donor DNA dramatically enhances precision editing, enabling efficient  
258 editing with shorter homology arms and at significantly lower donor DNA concentrations than  
259 previously recommended (PAIX *et al.* 2015; PAIX *et al.* 2017; DOKSHIN *et al.* 2018). We show that  
260 as many as 100 precisely edited progeny can be obtained from a single injected animal, an editing  
261 efficiency of nearly 50% of post injection progeny, and far exceeding the typical frequency of  
262 progeny transformed with simple extrachromosomal arrays (**Figure S2**) (MELLO *et al.* 1991).

263 Importantly, whereas the production of Roller transgenic progeny peaks during the first 24  
264 hours post-injection, *gfp* edits peak after 24 hours and remain high through the remainder of the  
265 injected animals brood. Previous studies also reported that most *gfp*-edited animals are produced  
266 on the second day after injection (PAIX *et al.* 2014). These findings suggest that developmental  
267 differences between distal (less mature) and proximal (more mature) germ nuclei may favor  
268 formation or acquisition of distinct transgene types. For example, perhaps the large *rol-6* plasmid  
269 molecules are excluded from germ nuclei, and instead rapidly assemble into cytoplasmic  
270 extrachromosomal arrays that are swept by the germ plasm into developing oocytes, and only enter  
271 nuclei after fertilization (as previously suggested (MELLO *et al.* 1991)). A size limitation on nuclear  
272 uptake may explain why we and others have found that donors over 2 kilo-basepairs yield few  
273 editing events (unpublished results) (PAIX *et al.* 2016; FARBOUD *et al.* 2019).

274 The observation that *gfp* editing peaks later, approximately 28 hours post injection, and  
275 then remains high, suggests either that proximal germ nuclei tend to exclude the donor, or that  
276 more distal nuclei are more receptive to recombination. Based on an ovulation rate of 23 minutes

277 (McCARTER *et al.* 1999), the appearance and persistence of GFP-positive progeny is consistent  
278 with editing in nuclei that were in pachytene (i.e., undergoing meiotic recombination) at the time  
279 of injection. Whatever the reason for the HDR enhancement caused by melting the donor it is  
280 striking that the extrapolated rates of precision *gfp* insertion within these pachytene nuclei range  
281 as high as 70%.

282 Donor purity is crucial to achieve high knock-in efficiencies of long inserts. Contaminating  
283 primer dimers that contain homology arms can compromise HDR efficiency by integrating at the  
284 target site. Removing these contaminants by gel-extracting the donors dramatically increased *gfp*  
285 knock-in efficiencies. Similarly, as a time saving alternative to gel-extraction we found that  
286 purification using SPRI paramagnetic beads also improves HDR efficiencies, however using the  
287 optimal ratio of beads to PCR reaction was critical to removing the shorter contaminants (See  
288 protocol **File S1**).

289 We do not know why melting the donor stimulates HDR. We obtained similar HDR rates  
290 across the entire range of donor concentrations, indicating that donor concentrations were saturated  
291 (or nearly so) at the lowest dose tested. Yet, melting the donor increased the HDR rate several fold  
292 at each concentration. Thus, melting stimulates recombination by acting on events or mechanisms  
293 that are independent of donor concentration. Conceivably, melting induces structural changes—  
294 e.g., denaturation bubbles caused by incomplete reannealing—that promote active nuclear uptake  
295 or directly stimulate repair. For example, single-stranded regions from incomplete re-annealing  
296 could promote strand invasion or act as damage signals that recruit trans-acting factors that  
297 facilitate HDR. Indeed, preliminary studies suggest that when we slow the cooling step to promote  
298 re-annealing, melted donors perform about half as well (**Figure S4**). Interestingly, melting did not  
299 stimulate the already high HDR efficiency of a shorter 400 nt donor (Data not shown). Clearly

300 more work is needed to fully explore and understand how donor-melting promotes HDR  
301 efficiency.

302           Undoubtedly, the high efficiencies of precision editing achieved here owe both to the easy  
303 access of worm pachytene germ cells to microinjection and to the remarkable receptiveness of  
304 these cells to HDR. A parallel study suggests that editing is enhanced even further when donor 5'  
305 ends are modified with tri-ethylene glycol (TEG) (GHANTA *et al.* 2018). Importantly, the  
306 combination of melting and TEG modifications increases the proportion of *gfp*-sized edits among  
307 the easily identified Roller progeny cohort by approximately twenty-fold from 1-2% to 20-40%.  
308 For experienced injectors, a single optimally injected animal can yield more than 100 GFP knock-  
309 ins (nearly two thirds of post-injection progeny), dramatically enhancing the ease and efficiency  
310 of genome editing. Given these high HDR efficiencies even researchers with little worm  
311 experience can now readily adopt this facile genetic animal model.

312



313 **Acknowledgements.** This work was funded by Howard Hughes Medical Institute (C.C.M.) and  
314 NIH R37 GM058800 (C.C.M). C.C.M is a Howard Hughes Medical Investigator. We thank Daniel  
315 Durning for technical assistance with preparation of *mCherry::znfx-1* injection mixes, Takao  
316 Ishidate for providing plasmid template for *linker-gfp-linker* donor PCRs and Darryl Conte, Jr. for  
317 critical review of the manuscript.

318 **Competing interests:** C.C.M is a co-founder and Scientific Advisory Board member of CRISPR  
319 Therapeutics. Some of the findings described here are part of the patent applications filed by the  
320 University of Massachusetts Medical School on which the authors are inventors.

321

322

## 323 References

- 324 Arribere, J. A., R. T. Bell, B. X. Fu, K. L. Artiles, P. S. Hartman *et al.*, 2014 Efficient marker-free  
325 recovery of custom genetic modifications with CRISPR/Cas9 in *Caenorhabditis elegans*.  
326 *Genetics* 198: 837-846.
- 327 Brenner, S., 1974 The genetics of *Caenorhabditis elegans*. *Genetics* 77: 71-94.
- 328 Cho, S. W., J. Lee, D. Carroll, J. S. Kim and J. Lee, 2013 Heritable gene knockout in  
329 *Caenorhabditis elegans* by direct injection of Cas9-sgRNA ribonucleoproteins. *Genetics*  
330 195: 1177-1180.
- 331 Dokshin, G. A., K. S. Ghanta, K. M. Piscopo and C. C. Mello, 2018 Robust Genome Editing with  
332 Short Single-Stranded and Long, Partially Single-Stranded DNA Donors in *Caenorhabditis*  
333 *elegans*. *Genetics* 210: 781-787.
- 334 Ebbing, A., P. Shang, N. Geijsen and H. Korswagen, 2017 Extending the CRISPR toolbox for *C.*  
335 *elegans*: Cpf1 as an alternative gene editing system for AT-rich sequences, pp.
- 336 Farboud, B., A. F. Severson and B. J. Meyer, 2019 Strategies for Efficient Genome Editing Using  
337 CRISPR-Cas9. *Genetics* 211: 431-457.
- 338 Forbes, D. J., M. W. Kirschner and J. W. Newport, 1983 Spontaneous formation of nucleus-like  
339 structures around bacteriophage DNA microinjected into *Xenopus* eggs. *Cell* 34: 13-23.
- 340 Ghanta, K. S., G. A. Dokshin, A. Mir, P. M. Krishnamurthy, H. Gneid *et al.*, 2018 5' Modifications  
341 Improve Potency and Efficacy of DNA Donors for Precision Genome Editing. bioRxiv.
- 342 Kim, H., T. Ishidate, K. S. Ghanta, M. Seth, D. Conte, Jr. *et al.*, 2014 A co-CRISPR strategy for  
343 efficient genome editing in *Caenorhabditis elegans*. *Genetics* 197: 1069-1080.
- 344 McCarter, J., B. Bartlett, T. Dang and T. Schedl, 1999 On the control of oocyte meiotic maturation  
345 and ovulation in *Caenorhabditis elegans*. *Dev Biol* 205: 111-128.
- 346 Mello, C. C., J. M. Kramer, D. Stinchcomb and V. Ambros, 1991 Efficient gene transfer in  
347 *C.elegans*: extrachromosomal maintenance and integration of transforming sequences.  
348 *EMBO J* 10: 3959-3970.
- 349 Paix, A., A. Folkmann, D. Rasoloson and G. Seydoux, 2015 High Efficiency, Homology-Directed  
350 Genome Editing in *Caenorhabditis elegans* Using CRISPR-Cas9 Ribonucleoprotein  
351 Complexes. *Genetics* 201: 47-54.
- 352 Paix, A., A. Folkmann and G. Seydoux, 2017 Precision genome editing using CRISPR-Cas9 and  
353 linear repair templates in *C. elegans*. *Methods* 121-122: 86-93.
- 354 Paix, A., H. Schmidt and G. Seydoux, 2016 Cas9-assisted recombineering in *C. elegans*: genome  
355 editing using in vivo assembly of linear DNAs. *Nucleic Acids Res* 44: e128.
- 356 Paix, A., Y. Wang, H. E. Smith, C. Y. Lee, D. Calidas *et al.*, 2014 Scalable and versatile genome  
357 editing using linear DNAs with microhomology to Cas9 Sites in *Caenorhabditis elegans*.  
358 *Genetics* 198: 1347-1356.
- 359 Prior, H., A. K. Jawad, L. MacConnachie and A. A. Beg, 2017 Highly Efficient, Rapid and Co-  
360 CRISPR-Independent Genome Editing in *Caenorhabditis elegans*. *G3 (Bethesda)* 7: 3693-  
361 3698.
- 362 Schwartz, M. L., and E. M. Jorgensen, 2016 SapTrap, a Toolkit for High-Throughput  
363 CRISPR/Cas9 Gene Modification in *Caenorhabditis elegans*. *Genetics* 202: 1277-1288.
- 364 Silva-Garcia, C. G., A. Lanjuin, C. Heintz, S. Dutta, N. M. Clark *et al.*, 2019 Single-Copy Knock-  
365 In Loci for Defined Gene Expression in *Caenorhabditis elegans*. *G3 (Bethesda)* 9: 2195-  
366 2198.

- 367 Stinchcomb, D. T., J. E. Shaw, S. H. Carr and D. Hirsh, 1985 Extrachromosomal DNA  
368 transformation of *Caenorhabditis elegans*. *Mol Cell Biol* 5: 3484-3496.
- 369 Tzur, Y. B., A. E. Friedland, S. Nadarajan, G. M. Church, J. A. Calarco *et al.*, 2013 Heritable  
370 custom genomic modifications in *Caenorhabditis elegans* via a CRISPR-Cas9 system.  
371 *Genetics* 195: 1181-1185.
- 372 Vicencio, J., C. Martinez-Fernandez, X. Serrat and J. Ceron, 2019 Efficient Generation of  
373 Endogenous Fluorescent Reporters by Nested CRISPR in *Caenorhabditis elegans*. *Genetics*  
374 211: 1143-1154.
- 375 Ward, J. D., 2015 Rapid and precise engineering of the *Caenorhabditis elegans* genome with lethal  
376 mutation co-conversion and inactivation of NHEJ repair. *Genetics* 199: 363-377.
- 377 Zhao, P., Z. Zhang, H. Ke, Y. Yue and D. Xue, 2014 Oligonucleotide-based targeted gene editing  
378 in *C. elegans* via the CRISPR/Cas9 system. *Cell Res* 24: 247-250.
- 379

380 **Figure Legends**

381 **Figure 1. Melting dsDNA donors potentiates homology directed repair in *C. elegans*. (A)**

382 Schematic representation to insert *gfp* at the N-terminus of a protein coding gene immediately  
383 down stream of start codon (atg) using symmetric melted dsDNA donors and Cas9-guideRNA  
384 ribonucleoproteins (RNPs) is shown; grey segment represents sequence upstream of the start  
385 codon. Precise repair (HDR) enables fluorescent protein expression. **(B)** HDR efficiencies at the  
386 *glh-1* locus using symmetric unmelted (grey bars) or melted donors (black bars) with *rol-6*  
387 injection marker at indicated concentrations (n=2 broods) is plotted as percentage of F1s  
388 expressing GFP per injected animal (P0). Using unmelted and melted donors, HDR efficiencies at  
389 the *glh-1* locus is plotted as **(C)** number of fluorescence+ animals among Rollers and non-Rollers  
390 from two representative broods. Percentage of animals expressing fluorescence among, **(D)** Rollers  
391 and **(E)** non-Rollers, is plotted as percentage (n = 3 or 4 broods) for *glh-1* locus. Similarly,  
392 improvement in fluorescent protein insertion efficiencies with melted donors are shown for **(F-H)**  
393 *csr-1* and **(I-K)** *znfx-1* loci. Each data point represents the percentage of animals expressing  
394 fluorescent protein among F1s scored in each cohort per brood. Bars represent median. Number of  
395 fluorescence+ animals over number of animals scored is shown above the bars. Green dots  
396 represent GFP and red dots represent mCherry insertions.

397 **Figure 2. Editing occurs later in the brood after roller cohort. (A)** Schematic representation of

398 the experiment is shown. 4 Injected animals placed on a single plate were moved at indicated post  
399 injection time points and F1 embryos laid during the time-intervals were scored for GFP as adults.  
400 **(B)** Fraction of the progeny produced in each time window that are Rollers (open black bars),  
401 GFP+ Rollers (open green bars) and GFP+ progeny (Rollers and non-Rollers, solid green bars) are  
402 plotted as percentage. Bars represent mean value of two replicates and each replicate consists of 4

403 P0 animals injected with 25 ng/ $\mu$ l of symmetric melted donors and 40 ng/ $\mu$ l of *rol-6* co-injection  
404 marker. Animals were cultured at 18°C-20°C.

405 **Figure 3. Purity of donor DNA is crucial for best HDR efficacy.** HDR efficiencies of donors  
406 prepared by different methods of purification are plotted for *hrde-1* and *F53H1.1*. (A) Number of  
407 GFP+ F1 Rollers and non-Rollers from two representative broods are plotted. GFP+ animals  
408 among, (B) Rollers and (C) non-Rollers is plotted as percentage of animals scored in each cohort  
409 per brood. Similarly, (D-F) HDR efficiencies are plotted for *F53H1.1* locus. (G) Insertions and  
410 deletions identified at *hrde-1* target site in F1 Rollers from two P0s (spin-column), (H) sanger  
411 sequencing trace of the 15bp non-random insert for a homozygous F2 animal. Partial homology  
412 arms of the donor are shown in blue and the sequence that got inserted into the genome is shown  
413 in red. (I) Schematic representation of predicted primer dimer formation is shown with 6bp perfect  
414 match and mismatched 3' tails. Part of each oligo that is homologous to the PCR template plasmid  
415 is shown in black (linkers on either end of *gfp*) and the homology arms are shown in blue and the  
416 sequence (Insert) that would get inserted through HDR is shown in red. All the donors were 5'  
417 TEG-modified and melted. Gel-purified donors were further cleaned-up with SPRI beads (See **File**  
418 **S1**).

419

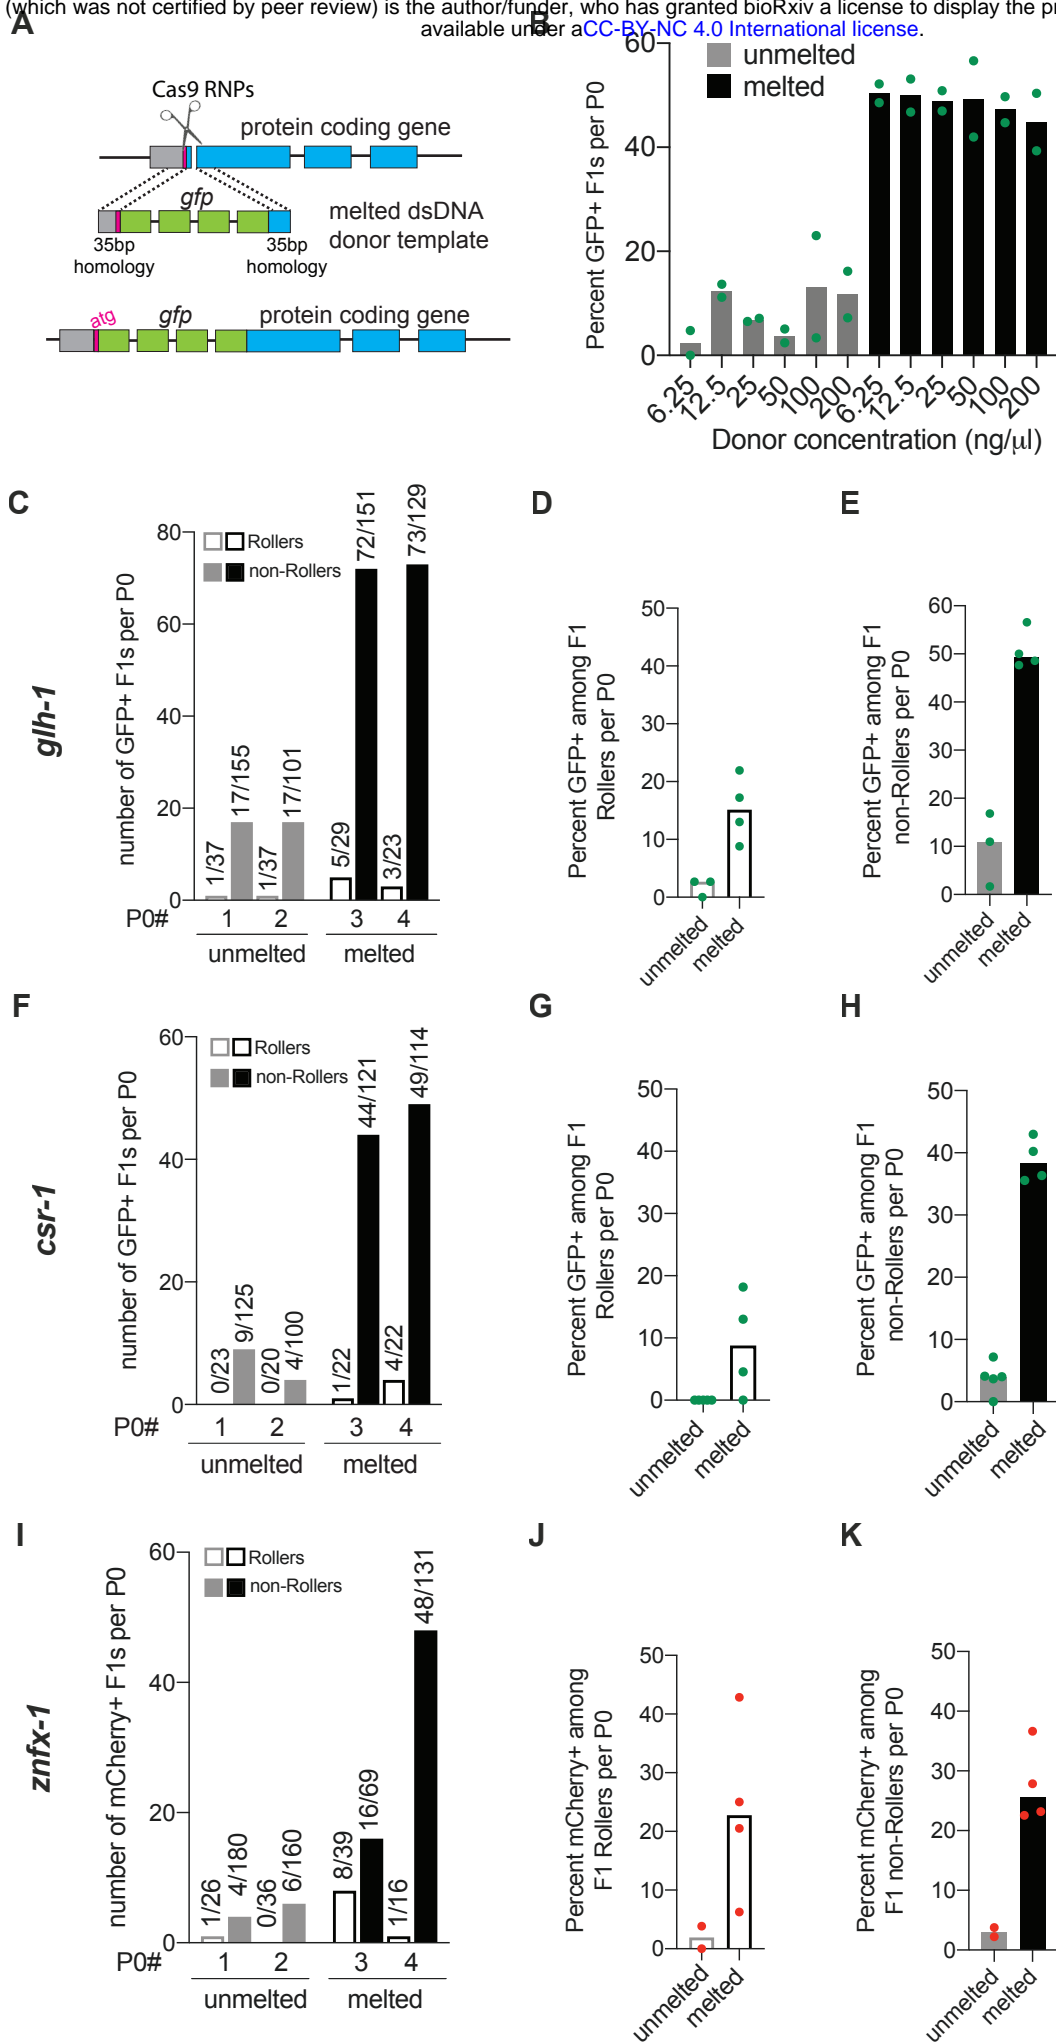

## Figure 2

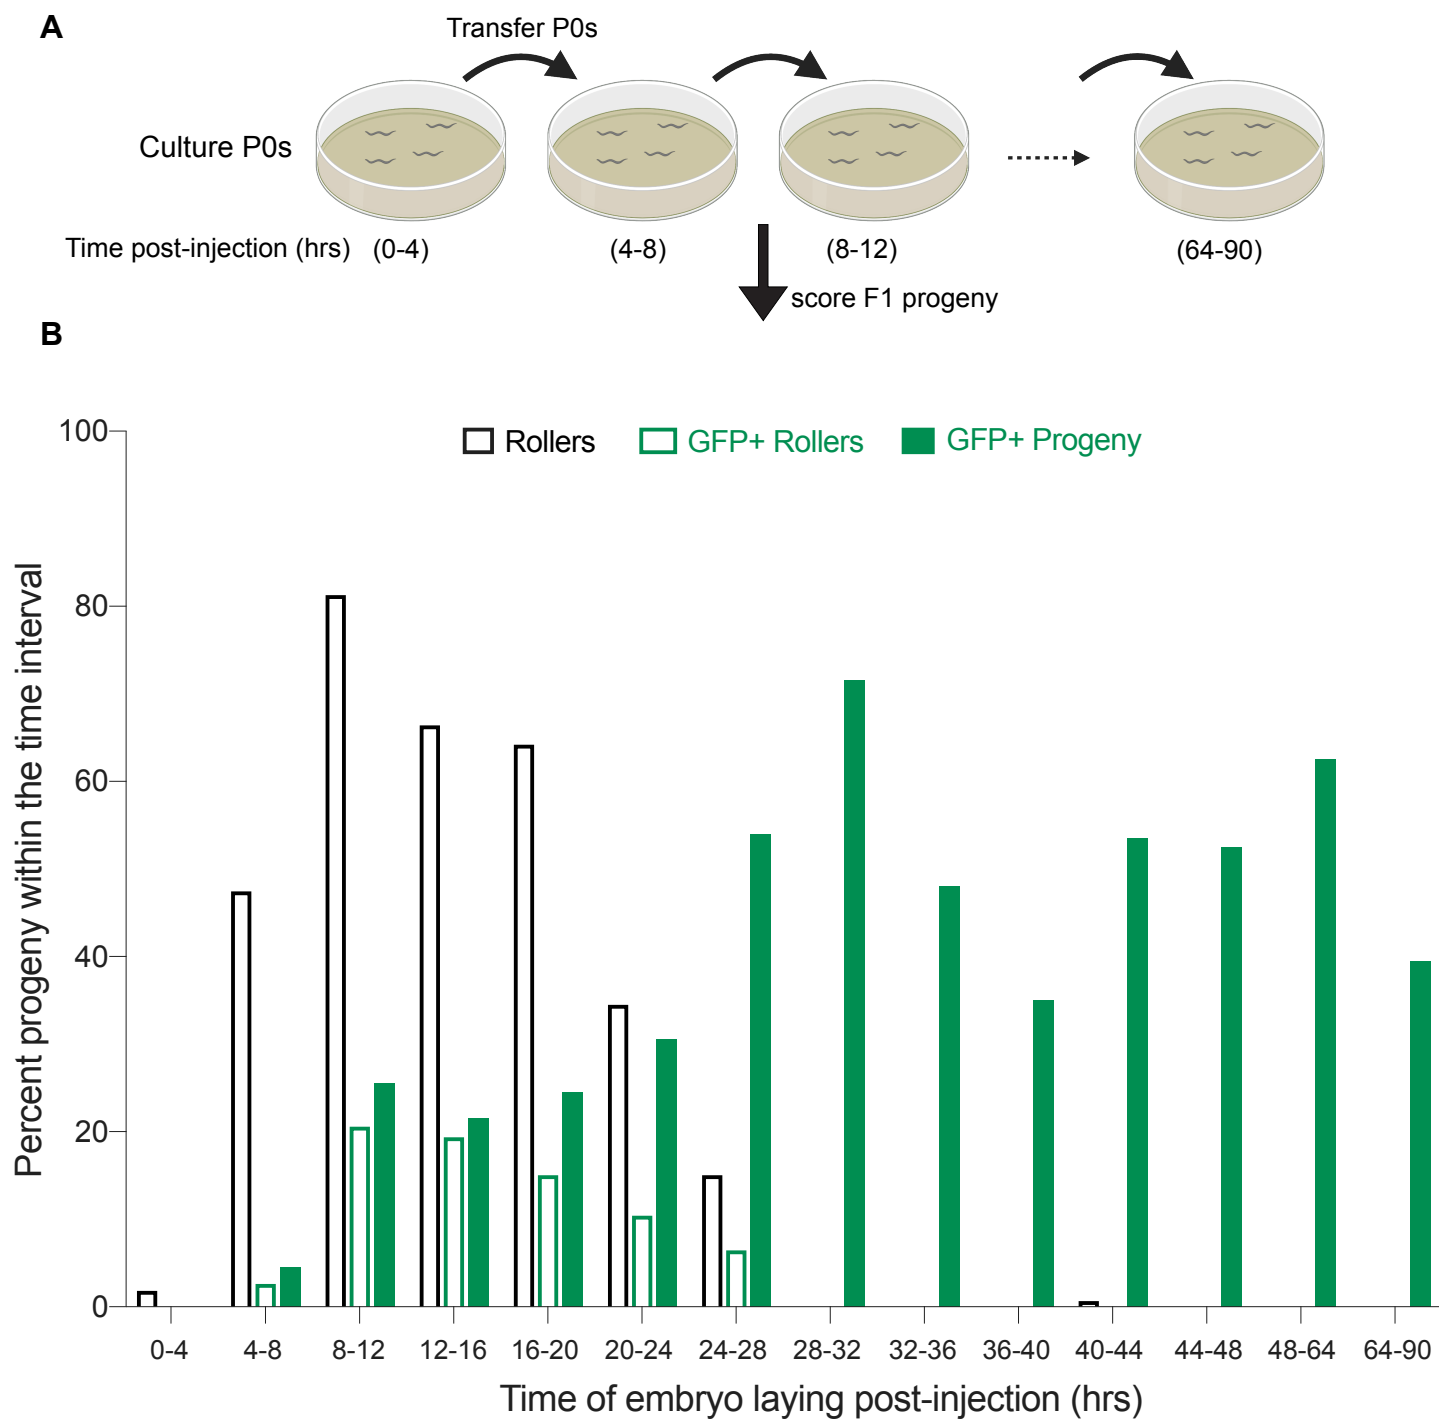

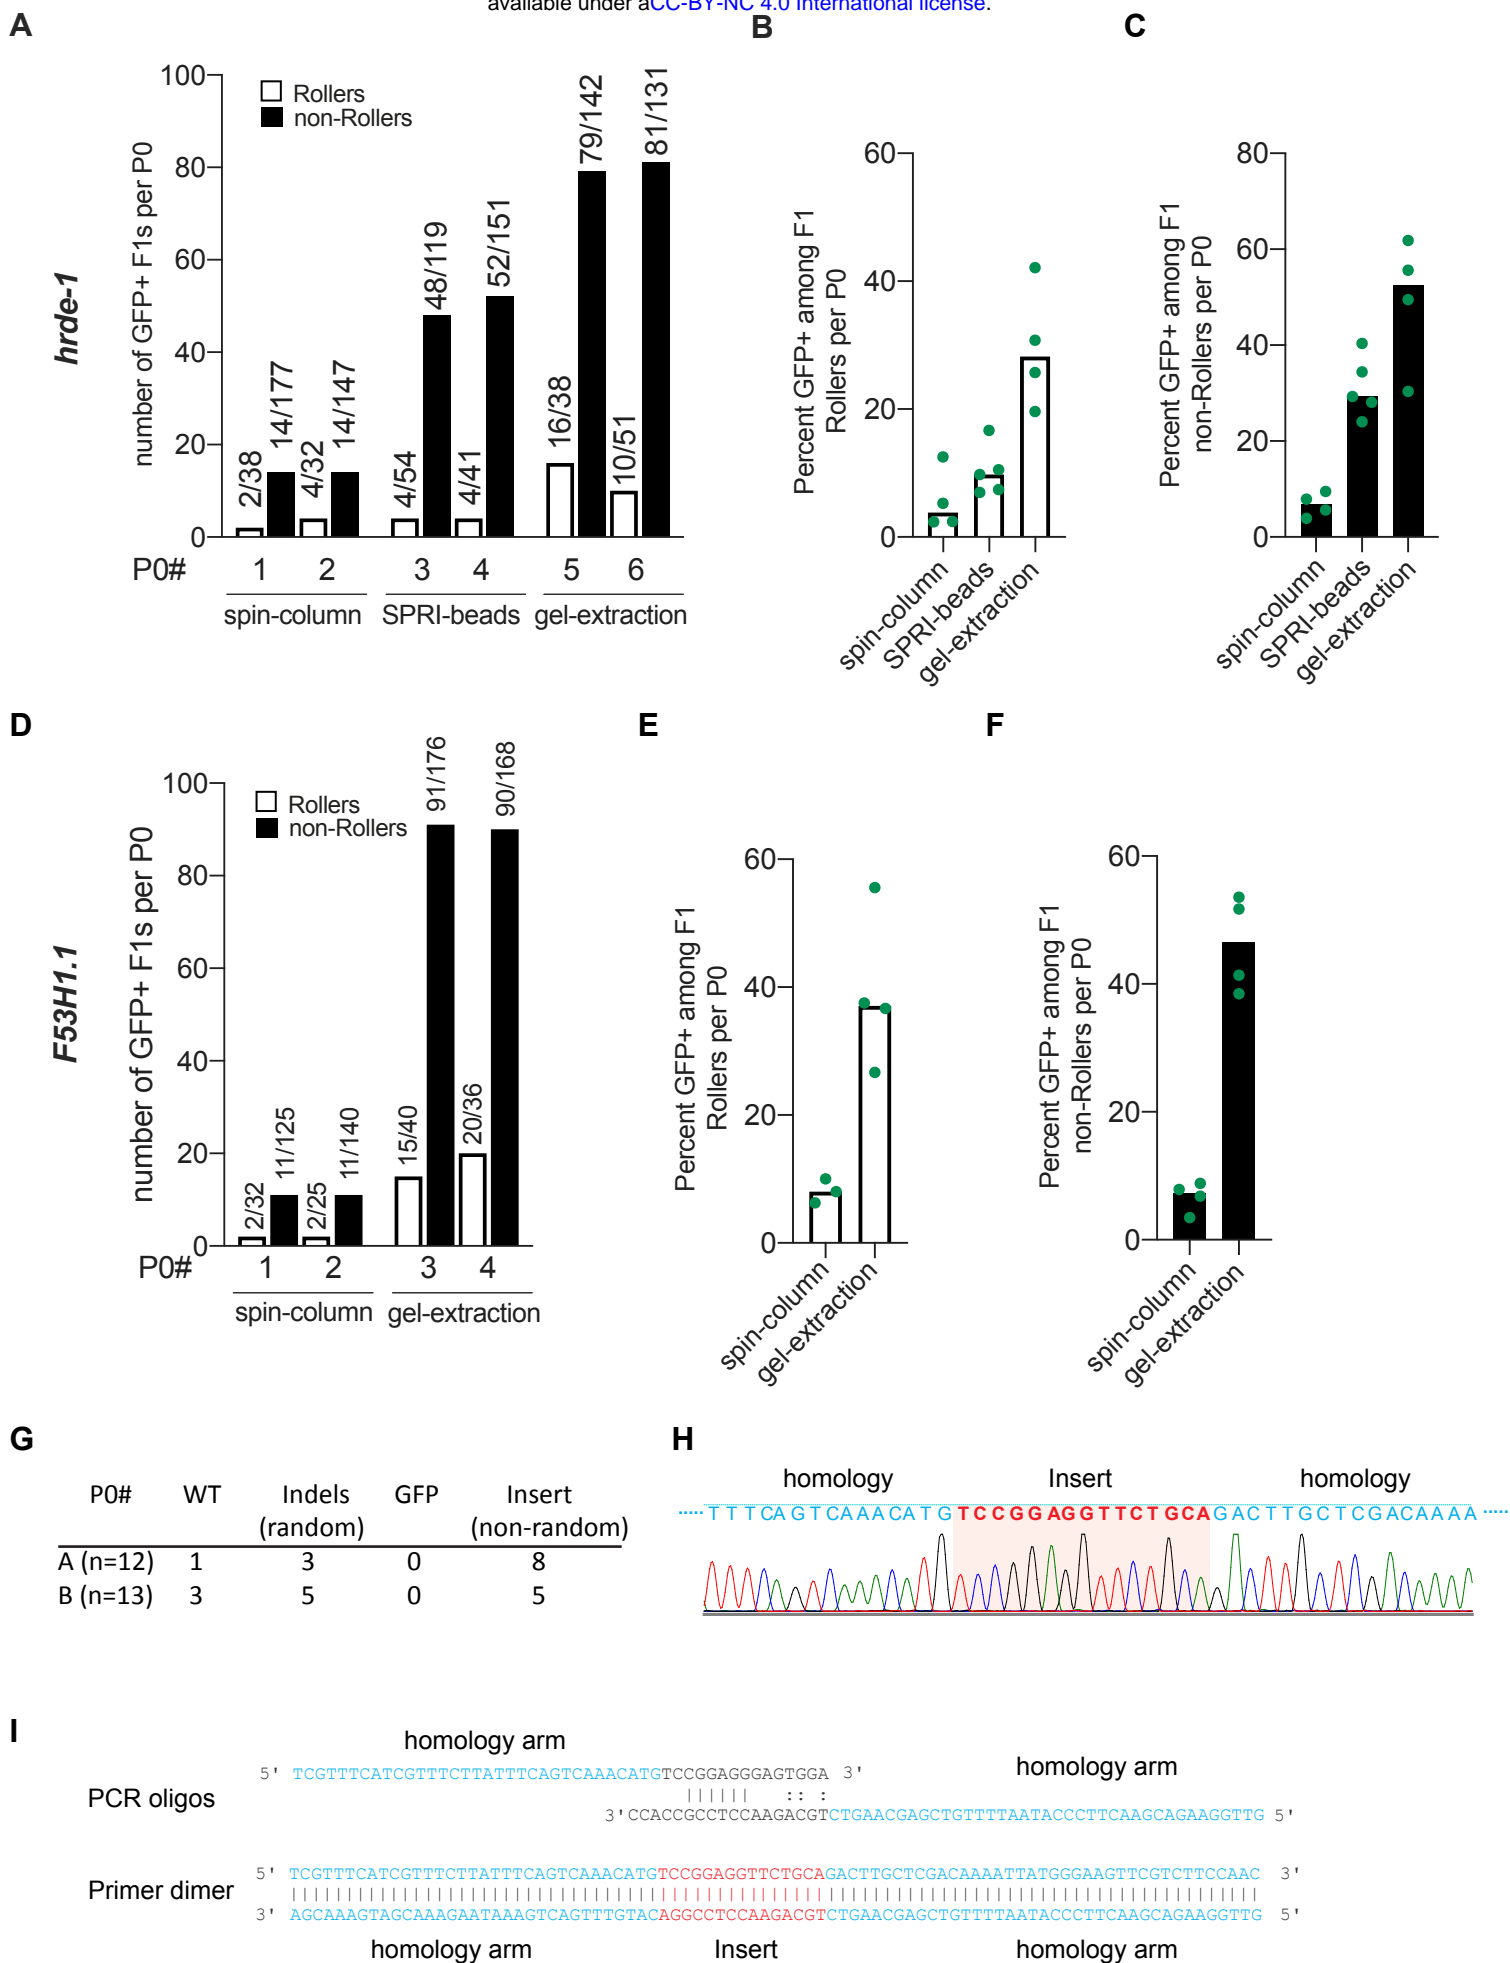



## Supplementary Figures

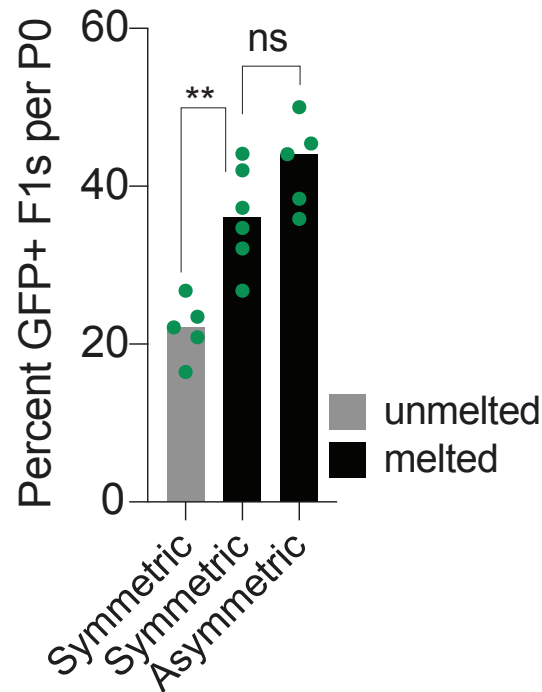

**Figure S1: Melted dsDNA donors promote homology directed repair.** HDR efficiencies at the *glh-1* locus using symmetric (unmelted or melted) and asymmetric donors (n=5 or 6 broods) without *rol-6* injection marker. Each data point (green) represents the percentage of animals expressing GFP among F1s scored per brood. Bars represent median. P-values (\*\*, 0.0087 and ns, 0.1255) were determined by Mann Whitney test (unpaired, non-parametric)

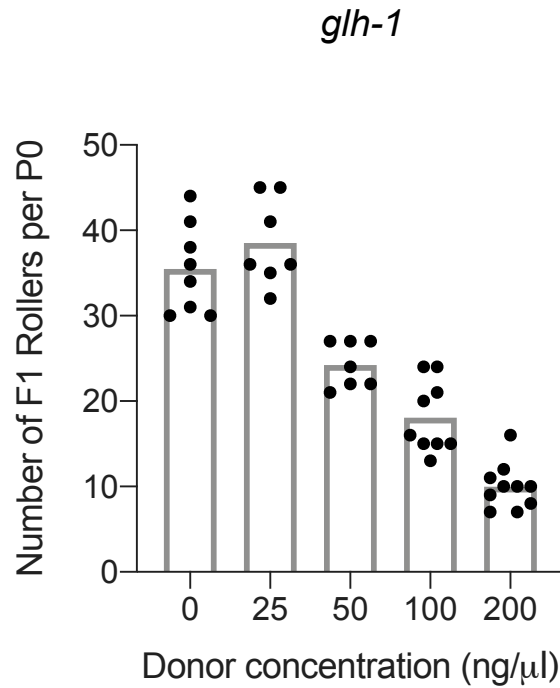

**Figure S2. High donor concentrations are toxic and reduce the number of Rollers.** Injection mixes contain Prf4::*rol-6(su1006)*, Cas9 protein, crRNA targeting *glh-1* locus and *gfp::glh-1* dsDNA donor with ~35bp homology arms at indicated doses. Each dot represents the number of F1 rollers obtained per P0 animal and the bar represents mean; (n=7 to 10 broods per condition). dsDNA donors were not melted.

## Cas12a based genome editing

A

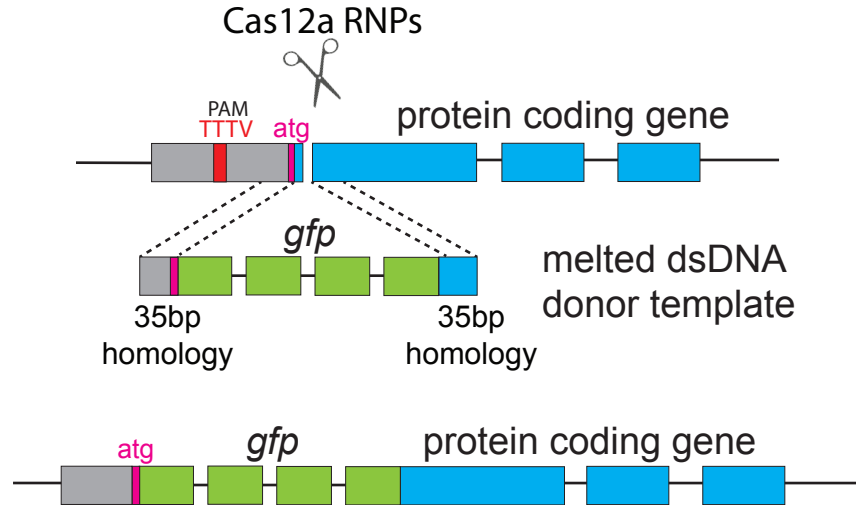

B

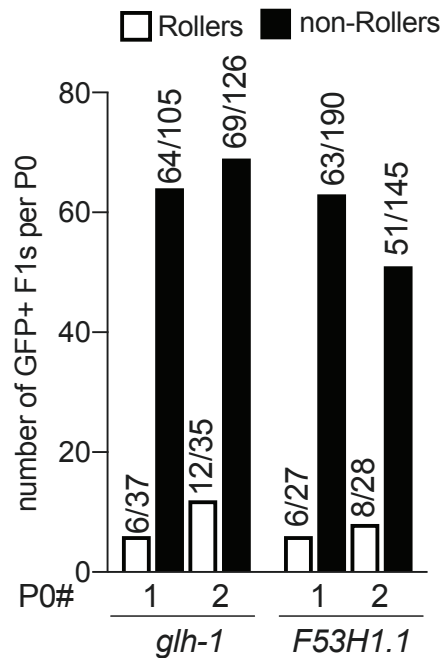

C

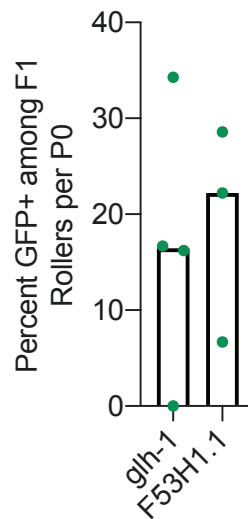

D

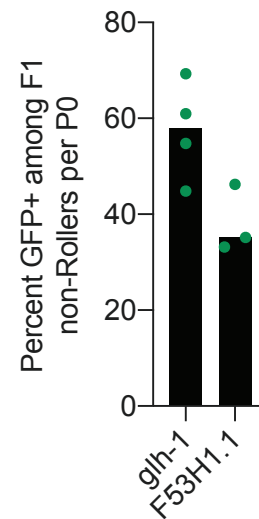

**Figure S3. Precise genome editing using Cas12a nuclease and melted dsDNA donors.** (A) Schematic representation of template dependent editing with Cas12a and melted dsDNA donor to insert *gfp* at the start codon (atg). Protospacer adjacent motif (PAM) for Cas12a system is TTTV, where V is A, C or G. HDR efficiencies at *glh-1* and *F53H1.1* loci are plotted as (B) number of GFP+ F1 animals among two representative broods, (C) percentage of GFP+ animals among F1 Rollers and (D) percentage of GFP+ animals among F1 non-Rollers; n= 3 or 4 broods. Number of GFP+ animals over number of animals scored are shown above the bars. Each data point represents the percentage of animals that are GFP+ among F1s scored in each cohort per brood and bars represent the median.

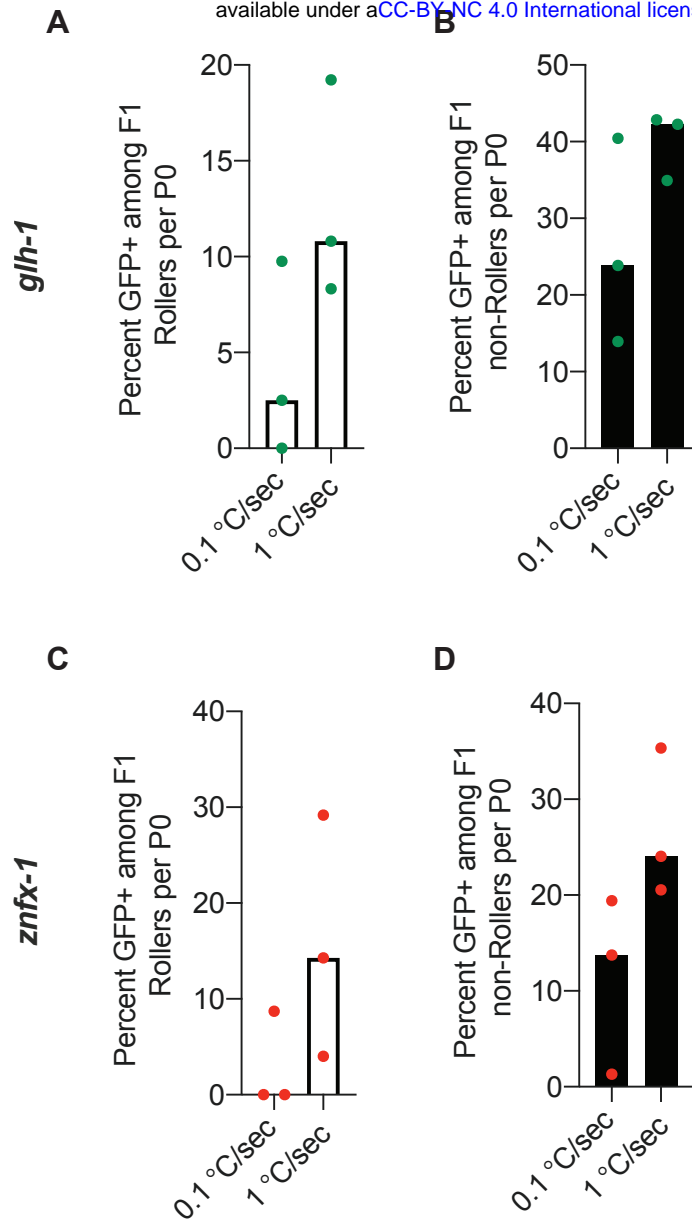

**Figure S4. Quickly cooled donors act as better repair templates than slowly cooled donors.** *gfp* (green dots) insertion efficiencies at *glh-1* loci are plotted for (A) Rollers and (B) non-Rollers using slow (0.1 °C/sec) and quick (1 °C/sec) cooled donors as percentage. (C and D) *mCherry* (red dots) insertion efficiencies at *znfx-1* locus. Each data point represents an F1 brood and bars represent median. Thermal cycler program for slow cooling: 95 °C - 2:00 min; 85 °C - 1:00 min; 75 °C - 1:00 min, 65 °C - 1:00 min, 55 °C - 1:00 min, 45 °C - 1:00 min, 35 °C - 1:00 min, 25 °C - 1:00 min, 4°C- hold. Ramp down rate: 0.1 °C/sec. See **File S1** for quick cooling conditions.

1

## Supplemental Information

2

1. Figure S1- Melted dsDNA donors promote homology directed repair

3

2. Figure S2- High donor concentrations are toxic and reduce the number of Rollers

4

3. Figure S3- Precise genome editing using Cas12a nuclease and melted dsDNA donors

5

4. Figure S4- Quickly cooled donors are better repair templates than slowly cooled donors

6

5. Table S1- List of *C. elegans* strains

7

6. Table S2- Sequences of crRNAs

8

7. Table S3- Sequences of Oligos

9

8. File S1- Detailed editing protocol

10 **Supplemental Table S1: List of *C. elegans* strains**

| Genotype                                          | Strain Name |
|---------------------------------------------------|-------------|
| F53H1.1(ne4815[gfp::F53H1.1]) IV                  | WM703       |
| glh-1(ne4816[gfp::glh-1]) I                       | WM704       |
| csr-1(ne4483[flagx3::linker::tev] IV              | WM705       |
| znfx-1(ne4817[mcherry::znfx-1]) II                | WM706       |
| hrde-1(ne4818[gfp::hrde-1]) III                   | WM707       |
| csr-1(ne4819[flagx3::linker::gfp::tev::csr-1]) IV | WM708       |

11

12 **Supplemental Table S2: Sequences of crRNAs**

| ID#    | Target locus               | Sequence (5'→3')       | Notes                                 |
|--------|----------------------------|------------------------|---------------------------------------|
| CMG-18 | <i>hrde-1</i>              | CATAATTTTGTGCGAGCAAGT  | To insert N-terminal tag              |
| CMG-25 | <i>csr-1</i>               | AAGATGTTTCAGGGCAAGTCT  | To insert N-terminal tag              |
| CMG-33 | <i>Flagx3::linker::tev</i> | TATAAAGACGATGACGATAA   | To insert gfp at csr-1 locus          |
| CMG-34 | <i>glh-1</i>               | TTTTCTGCGAAAATGTCTGA   | To insert N-terminal tag              |
| CMG-35 | <i>glh-1</i>               | TGCGAAAATGTCTGATGGTTG  | To insert N-terminal tag; (A.s. Cpf1) |
| CMG-77 | <i>F53H1.1</i>             | TTCCAGTTTTTCGATGGGTCG  | To insert N-terminal tag              |
| CMG-79 | <i>F53H1.1(A.s. Cpf1)</i>  | CAGTTTTTCGATGGGTCGCGGC | To insert N-terminal tag              |
| CMG-88 | <i>znfx-1</i>              | AGGTTTCTGACCATTGAATA   | To insert N-terminal tag              |

13

14 **Supplemental Table S3: Sequences of oligos**

| ID#        | Sequence (5'→3')                                                                                                                                                                                       | Notes                                                             |
|------------|--------------------------------------------------------------------------------------------------------------------------------------------------------------------------------------------------------|-------------------------------------------------------------------|
| cmo-KG475F | ATTTTCTGGAAAAATCTTAA                                                                                                                                                                                   | <i>gfp::glh-1</i> donor                                           |
| cmo-KG476R | TTAGCAGCACTTTCGCTATC                                                                                                                                                                                   |                                                                   |
| cmo-KG830F | /SP9/TCGTTTCATCGTTTCTTATTTCAGTCAAACATGTCCGGAGGGAGTGGA                                                                                                                                                  | <i>gfp::hrde-1</i> donor                                          |
| cmo-KG831R | /SP9/GTTGGAAGACGAACCTCCATAATTTTGTGCGAGCAAGTCTGCAGAACCTCCGCCACC                                                                                                                                         |                                                                   |
| cmo-KG832F | /SP9/ATCCAAAAATCCCAATTTTTTCCAGTTTTTCGATGTCCGGAGGGAGTGGA                                                                                                                                                | <i>gfp::F53H1.1</i> donor                                         |
| cmo-KG833R | /SP9/ACGCTTTCGTTTGTGCTCTTTGTGCTCGCCGCGACCAGAACCTCCGCCACC                                                                                                                                               |                                                                   |
| cmo-T1193F | CTTGTTTCAGACCAATTCGCCAACCATTCAATGGTCTCAAAGGGTGAAGAAGA                                                                                                                                                  | <i>mCherry::znfx-1</i> donor                                      |
| cmo-T1194R | GGCGGCGGGAGCCCTGGGGGGGCGAGGTTTCTGACCTTATAACAATTCATCCATGC                                                                                                                                               |                                                                   |
| cmo17648   | AATCTCAATCAGGACGGTAAAG                                                                                                                                                                                 | <i>hrde-1</i> indel detection                                     |
| cmo17649   | GAACCTCCTAGGCATAATGTGTA                                                                                                                                                                                |                                                                   |
| cmo-JG55F  | ACATAAAACGATAAATCGGC                                                                                                                                                                                   | <i>F53H1.1</i> indel detection                                    |
| cmo-JG56R  | TTCCGTGACTCTCCATTTT                                                                                                                                                                                    |                                                                   |
| cmo-KG825R | CGCCGTTTACTCTCTTT                                                                                                                                                                                      |                                                                   |
| cmo17659   | CGATTGGAAGTAGAGGTTCT                                                                                                                                                                                   | <i>gfp::csr-1</i> donor                                           |
| cmo17660   | ATCATGATATTGACTATAAA                                                                                                                                                                                   |                                                                   |
| cmd-25     | gaactatacttttcaggactaactctgacatgGATTACAAAGACCATGATGGTGACTATAAGGATCATGATA<br>TTGACTATAAAGACGATGACGATAAGGGTGGCGGAGAGAACCTCTACTTCCAATCGaaCca<br>AaaAcaGaaCccTagGctAgcActAaacatctcggccttgagctctgagcgaacgat | ssODN donor to knock-in flagx3::linker::tev at <i>csr-1</i> locus |

15

# Melting dsDNA donor molecules potentiates precision genome editing in *C. elegans*

## Cas9 Based Genome Editing

### I. Materials:

1. *S. pyogenes* Cas9 3NLS (10  $\mu\text{g}/\mu\text{l}$ , IDT)
2. tracrRNA (IDT)
3. crRNA (2 nmol or 10 nmol, IDT)
4. ssODN 4 nmol Ultramer (standard desalting, IDT)
5. PRF4::*rol-6*(*su1006*) plasmid (high quality Midi or Maxiprep)
6. SPRI paramagnetic beads (AMPure XP, Beckman Coulter)

### Re-suspension (Stock Solutions):

1. Aliquot 0.5  $\mu\text{l}$  (5  $\mu\text{g}$  or 30 pmol) of Cas9 protein and store at  $-80^{\circ}\text{C}$  (avoid freeze/thaw cycles)
2. tracrRNA – 0.4  $\mu\text{g}/\mu\text{l}$  (18 $\mu\text{M}$ ) in IDT nuclease free duplex buffer, store at  $-20^{\circ}\text{C}$  (aliquots at  $-80^{\circ}\text{C}$ )
3. crRNA – 0.4  $\mu\text{g}/\mu\text{l}$  (34  $\mu\text{M}$ ) in TE PH 7.5 (IDT), store at  $-20^{\circ}\text{C}$  (aliquots at  $-80^{\circ}\text{C}$ )
4. ssDNA oligo donor – 1  $\mu\text{g}/\mu\text{l}$  in ddH<sub>2</sub>O, store at  $-20^{\circ}\text{C}$
5. PRF4::*rol-6* (*su1006*): 500 ng/ $\mu\text{l}$ , store at  $-20^{\circ}\text{C}$

### II. Injection mixture preparation:

Add components of the injection mixture to the tube containing Cas9 in the following sequence:

1. Cas9 – 0.5  $\mu\text{l}$  of 10  $\mu\text{g}/\mu\text{l}$  stock (30 pmol)
2. Add tracrRNA – 5  $\mu\text{l}$  of 0.4  $\mu\text{g}/\mu\text{l}$  stock (90 pmol)
3. Add crRNA – 2.8  $\mu\text{l}$  of 0.4  $\mu\text{g}/\mu\text{l}$  stock (95 pmol) (if two guides are needed add 1.4  $\mu\text{l}$  of each)
4. Pipette the mixture gently several times and incubate @ $37^{\circ}\text{C}$  for 15 minutes. In our experience adding any double stranded DNA before RNP complex formation reduces HDR efficiency.
5. Add ssODN donor – 2.2  $\mu\text{l}$  of 1  $\mu\text{g}/\mu\text{l}$  stock (or)  
Add melted dsDNA – 500 ng (final concentration: 25 ng/ $\mu\text{l}$  for ~1kb donors or 45 fmol/ $\mu\text{l}$ )
6. Add PRF4::*rol-6* (*su1006*) plasmid – 1.6  $\mu\text{l}$  of 500 ng/ $\mu\text{l}$  stock
7. Add nuclease free water to bring the final volume to 20  $\mu\text{l}$  and pipette gently several times.
8. To avoid needle clogging, centrifuge the mixture @14000rpm for 2 min, transfer about 17  $\mu\text{l}$  of the mixture to a fresh tube and keep the tube on ice; proceed to loading the needles.

#### Notes:

- All the above steps in section II can be performed at room temperature
- Aggregation is not an issue under these Cas9 concentrations.
- Final injection mixture can be stored at  $4^{\circ}\text{C}$  and re-used for several months (up to 6 months) without compromising efficiency; we have not yet tested mixes that are older than 6 months.



## **Cas12a (Cpf1) Based Genome Editing**

### **I. Materials:**

1. A.s. Cas12a Ultra (10  $\mu\text{g}/\mu\text{l}$ , IDT)
2. Cpf1-crRNA 21 bases long (2 nmol or 10 nmol, IDT)
3. ssODN 4 nmol Ultramer
4. PRF4::*rol-6*(*su1006*) plasmid (high quality Midi or Maxiprep)
7. SPRI paramagnetic beads (AMPure XP, Beckman Coulter)

### **Re-suspension (Stock Solutions):**

1. Aliquot 0.5  $\mu\text{l}$  (5  $\mu\text{g}$  or 32 pmol) of Cas12a protein and store at  $-80^{\circ}\text{C}$  (avoid freeze/thaw cycles)
2. Cas12a-crRNA – 40  $\mu\text{M}$  in TE PH 7.5 (IDT), store at  $-20^{\circ}\text{C}$  (aliquots at  $-80^{\circ}\text{C}$ )
3. ssDNA oligo donor – 1  $\mu\text{g}/\mu\text{l}$  in ddH<sub>2</sub>O, store at  $-20^{\circ}\text{C}$
4. PRF4::*rol-6* (*su1006*): 500 ng/ $\mu\text{l}$ , store at  $-20^{\circ}\text{C}$

### **II. Injection mixture preparation:**

Add components of the injection mixture to the tube containing Cas9 in the following sequence:

1. Cas12a – 0.5  $\mu\text{l}$  of 10  $\mu\text{g}/\mu\text{l}$  stock (32 pmol)
2. Add cas12a-crRNA – 2.5  $\mu\text{l}$  of 40  $\mu\text{M}$  stock (100pmol)
3. Add TE PH 7.5 – 3.0  $\mu\text{l}$
4. Pipette the mixture gently several times and incubate @ $37^{\circ}\text{C}$  for 15 minutes
5. Add ssODN donor – 2.2  $\mu\text{l}$  of 1  $\mu\text{g}/\mu\text{l}$  stock (or)  
Add melted dsDNA – 500 ng (final concentration: 25 ng/ $\mu\text{l}$  for ~1kb donors or 45 fmol/ $\mu\text{l}$ )
6. Add PRF4::*rol-6* (*su1006*) plasmid – 1.6  $\mu\text{l}$  of 500 ng/ $\mu\text{l}$  stock
7. Add nuclease free water to bring the final volume to 20  $\mu\text{l}$  and pipette gently several times.
8. To avoid needle clogging, centrifuge the mixture @14000rpm for 2 min, transfer about 17  $\mu\text{l}$  of the mixture to a fresh tube and keep the tube on ice; proceed to loading the needles.

### **Notes:**

- *All the above steps in section II can be performed at room temperature*
- *TE is added in step 3 for easier pipetting; by further diluting the crRNA stock this step can be omitted.*

### III. Donor Design and Generation

#### **ssODN donors:**

To generate ssODN donor, add 35 bases of 5' homology sequence in front of the tag (or mutations) and 35 bases of the 3' homology sequence at the end. Mutate the PAM site or the guide binding sequence if it is not already disrupted by the insert. If the guide binding sequence is mutated or if silent mutations are introduced between the guide cleavage site and the desired insertion site, length of homology sequence should be 35bp from the last mutation.

#### **dsDNA donors:**

Generate dsDNA donors by PCR either by using unmodified oligos or 5' SP9-modified oligos.

1. Order unmodified (or 5' SP9 modified) oligos with standard desalting (IDT); 35nt as homology arms and 20nt complementary to insert (eg: GFP). SP9 modifications are available at 100nmol scale from IDT.
2. Perform PCR with an insert-containing plasmid as the template for amplification; use High-Fidelity polymerase.
3. Run a few microliters of PCR on agarose gel to check if a single bright band is obtained. If non-specific amplification is observed, set up a temperature gradient and find the optimal temperature.
4. PCR clean-up: use one of the following three options depending on your experimental conditions.
  - a. Purify the PCRs using spin-columns and elute DNA in 20  $\mu$ l of nuclease free water. Generally, column purification is sufficient, and you may proceed to step 5. However, some primer pairs produce long (~80bp) primer dimers that may contain the entire homology arms. Spin-columns may not be able to remove dimers of this length completely. We found that these short "dimer donors" are preferentially used as templates over full-length donors with the desired insert (such as GFP). *Note:* Dimers may or may not be visible on the agarose gel.
  - b. If dimer formation is a concern, use 0.6x SPRI beads (AMPure XP) to perform the clean-up instead of spin-columns. For example: add 60  $\mu$ l of beads to 100 $\mu$ l of PCR, wash with 70% ethanol twice, elute in nuclease free water (refer to the bead manufacturer's protocol for further details).
  - c. If primer dimers are clearly visible on the gel, then it is best to gel-extract the DNA. However, gel extracted DNA can be toxic, presumably due to the presence of guanidine hydrochloride (component of binding buffer) in the final elute. To reduce salt contamination, incubate the column with wash buffer for 10 min before centrifugation; repeat washes 2-3 times. Strong absorbance at 230nm on Nanodrop suggests GuHCl contamination. For best results, gel-extracted DNA should be further purified with 1x to 1.5x AMPure XP beads (strongly recommended).
5. After purification, dilute a portion of dsDNA PCR donor to 100 ng/ $\mu$ l and transfer about 5.5  $\mu$ l to a PCR strip tube and proceed to the heating step.
6. Heat to 95 °C and cool to 4 °C using thermal cycler (95 °C-2:00 min; 85 °C-10 sec, 75 °C-10 sec, 65 °C-10 sec, 55 °C-1:00 min, 45 °C-30 sec, 35 °C-10 sec, 25 °C- 10 sec, 4 °C-hold. Ramp down at 1 °C/sec at every step).
7. Add melted donor DNA to rest of the injection mixture only after pre-incubating RNP complexes.

*Note: we store purified donors at -20 °C and melt them right before adding to the injection mix. We have not explored storage and re-use of melted donors.*

#### IV. **Micro-injection and Screening:**

1. Inject 5 to 10 young adults and transfer them onto individual plates. If both arms of the hermaphrodite gonad are injected, a good injection should yield 20 to 40 F1 Rollers.
2. After about 72 hours post injection, score for number of F1 Rollers and choose 2 plates with the highest number of Rollers.  
*Note: We generally culture the injected animals at room temperature (~22°C-23°C).*
3. a. For ssODN-based editing: choose 2 P0 plates that segregate the highest number of F1 Rollers; pick about 24 F1 Rollers from these 2 plates and place them onto separate plates.  
b. For dsDNA-based editing: Choose 2 plates that segregate the highest number of F1 Rollers and from these 2 plates, pick ~24 non-Rollers that are younger than Rollers and place them onto separate plates. Younger animals among the Roller cohorts can also be picked. For inexperienced injectors, we recommend using 5' end-modified dsDNA donors and picking F1 Rollers.
4. To avoid false positives due to mosaicism in F1 animals, pick several F2s from each plate, perform pooled lysis and genotype. Genotyping primers should lie outside of the homology arms to avoid amplification from transiently retained donor molecules.
5. Alternatively, correct insertions of fluorescent tags can be screened under a fluorescence dissecting scope or by using high magnification fluorescence microscope. For high magnification screening, mount several F2 animals onto 2% agarose pads and immobilize with levamisole.
